# Supplementary material for: Differential microRNAs in human serum and sperm after childhood trauma with potential implications for offspring health
Source: bioRxiv or medRxiv preprint supplement (doi:10.1101/2020.08.11.20168393), 2026-06-08
Supplement: Supplementary file [file 2020.08.11.20168393-2.pdf]

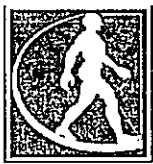

# Chughtai Laboratories, Lahore, Pakistan

**Subject:** Authorization for Participation in Multi-Centre Study

**Title of Project:** Distinct microRNA signature in human serum and germline after childhood trauma

**Principal Investigator:** Dr. Ali Jawaid

## **Institutions / Organizations:**

1. Laboratory of Neuroepigenetics, University of Zurich (UZH) and Swiss Federal Institute of Technology (ETH), Neuroscience Center Zurich, Zurich, Switzerland
2. Syed Babar Ali School of Science and Engineering, Lahore University of Management Sciences, Lahore, Pakistan
3. Aga Khan University, Karachi, Pakistan
4. SOS Children's Village National Office, Lahore, Pakistan
5. Chughtai Laboratories Private Limited, Lahore, Pakistan
6. EMBL-Nencki Center of Excellence for Neural Plasticity and Brain Disorders (Braincity), Nencki Institute of Experimental Biology, Warsaw, Poland
7. Department of Neurology, University of Texas Health Science Center, Houston, TX, USA

## **Terms & Conditions:**

1. Principal Investigator (Dr. Ali Jawaid) is authorized to perform above mentioned study at the nominated site of Chughtai Laboratories Head Office, Jail Road, Lahore, Pakistan.
2. The on-site procedures of this study involve recruitment of volunteer adult men for anonymous interviews about their childhood traumatic experiences through validated scales by trained medical personnel.
3. Collection of coded seminal fluid samples of above-mentioned volunteers for anonymized molecular assessments.
4. This study has the potential to increase our understanding of how early life experiences interact with the other body organs and confer susceptibility to diseases in individuals, as well as, their offspring.
5. The administration of Chughtai Laboratories has been appraised of the study rationale and procedures including and find these to our satisfaction.
6. The administration of Chughtai Laboratories wishes his team all the best in endeavor.

**Prof. A. S. Chughtai**  
Chief Executive Officer  
Dated: 01 February 2019
