# Supplementary material for: Differential microRNAs in human serum and sperm after childhood trauma with potential implications for offspring health
Source: bioRxiv or medRxiv preprint supplement (doi:10.1101/2020.08.11.20168393), 2026-06-08

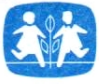

30.08.2018

Prof. Dr. Isabelle M. Mansuy,  
Laboratory of Neuroepigenetics,  
University of Zurich (UZH)/ Swiss Federal Institute of  
Technology (ETH)

Your Ref: SOS-PAK-GEN-CSR  
Phone: 042-35917846-47  
Fax: 042-35917843  
E-mail: nd@sos.org.pk

Dear Prof Mansuy

**Project title:** How nurture influences nature across generations: An epigenetic approach from gametes to behaviour

I am pleased to advise you that the above research project meets the requirements of The National Bioethics Committee's Research Ethics Committee (NBC-REC). Subsequently, the National Director of the SOS Village Pakistan grants the ethical approval for this research project.

The nominated participating sites in this project are: **SOS Children Villages in Pakistan**

Approval of this project from the National Director, SOS village, Pakistan is valid from Oct 2017 subject to the following conditions being met:

- The Coordinating Principal Investigator will immediately report anything that might warrant review of ethical approval of the project.
- The Coordinating Principal Investigator will notify the National Director, SOS Villages, Pakistan of any event that requires a modification to the protocol and submit any required amendments in accordance with the instructions provided by the NBC-RC.
- The Coordinating Principal Investigator will submit any necessary reports related to the safety of research participants in accordance with the SOS Villages policy and procedures.
- The Coordinating Principal Investigator will report to the in the specified format and notify when the project is completed at all sites.
- The Coordinating Principal Investigator will notify the National Director, SOS Villages, Pakistan if the project is discontinued at a participating site before the expected completion date, with reasons provided.

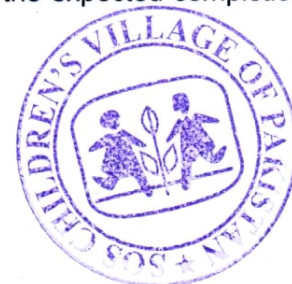

Supplement: Supplementary file [file 2020.08.11.20168393-3.pdf]
