# Supplementary material for: Differential microRNAs in human serum and sperm after childhood trauma with potential implications for offspring health
Source: bioRxiv or medRxiv preprint supplement (doi:10.1101/2020.08.11.20168393), 2026-06-08
Supplement: Supplementary file [file 2020.08.11.20168393-4.pdf]

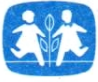

- The Coordinating Principal Investigator will notify the National Director of the SOS Villages, Pakistan of any plan to extend the duration of the project past the approval period listed above and will submit any associated required documentation.
- The Coordinating Principal Investigator will notify the National Director of SOS Village Pakistan of his or her inability to continue as Coordinating Principal Investigator including the name of and contact information for a replacement.

**This letter constitutes ethical approval only.** This project cannot proceed at any site until separate research governance authorisation has been obtained from the CEO or Delegate of the institution under whose auspices the research will be conducted at that site.

I wish you every success in your research.

Yours faithfully,

Signature

Saba Faisal  
National Director

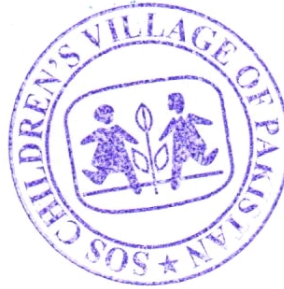

This ethical approval is in accordance with the *National Statement on Ethical Conduct in Human Research (2007)*.
